# Supplementary material for: Cryo- EM structure of the mycobacterial 70S ribosome in complex with ribosome hibernation promotion factor RafH
Source: PubMed Central journal article supplement (PMC10799931; doi:10.1038/s41467-024-44879-y), 2024-01-20
Supplement: 41467_2024_44879_MOESM3_ESM.pdf [file 41467_2024_44879_MOESM3_ESM.pdf]

## **Description of Additional Supplementary Files**

### **File name: Supplementary Movie 1**

**Description:** An animation for the Figure 2d, created by rotating 360° along Y-axis, where cryo-EM density in mesh and model in stick style corresponds to RafH linker region residues, 111-124 (maroon), and a-SD region of 16S rRNA nucleotides, 1518-1522 (khaki), are shown.

### **File name: Supplementary Movie 2**

**Description:** An animation for the Figure 3 bottom left panel created by rotating 360° along Y-axis, where cryo-EM density in mesh and model in stick style corresponds to RafH helix  $\alpha 1$  R75 (maroon), with Bridge B2a;16S rRNA nucleotides, 1477-1478 (khaki) and 23S rRNA nucleotide A2137 (sky blue), are shown.

### **File name: Supplementary Movie 3**

**Description:** An animation for the Figure 3 bottom right panel created by rotating 360° along Y-axis, where cryo-EM density in mesh and model in stick style corresponds to RafH helix  $\alpha 1$  (maroon) and helix 23s rRNA h44 (khaki), are shown.

### **File name: Supplementary Movie 4**

**Description:** An animation for the Figure 3 middle right panel created by rotating 360° along Y-axis, where cryo-EM density in mesh and model in stick style corresponds to RafH helix  $\alpha 3$  W96 (maroon) and helix 23s rRNA G673 (khaki), are shown.

### **File name: Supplementary Movie 5**

**Description:** An animation for the Figure 3 top right panel created by rotating 360° along Y-axis, where cryo-EM density in mesh and model in stick style corresponds to RafH helix  $\alpha 2$  (maroon) and helix 23s rRNA C1382 and C1383 (khaki), are shown.

**File name: Supplementary Movie 6**

**Description:** An animation for the Figure 3 top left panel created by rotating 360° along Y-axis, where cryo- EM density in mesh and model in stick style corresponds to RafH amino acid residues from strands  $\beta$ 2,  $\beta$ 3, and  $\beta$ 4 (maroon) and 23s rRNA h31, U947 and G948 (khaki), are shown.
